# Supplementary figures and images for: Functional and anatomical specificity in a higher olfactory centre
Source: eLife journal article supplement (doi:10.7554/elife.44590), 2019-05-21

Figure S2

A  
LH input  
skeletons

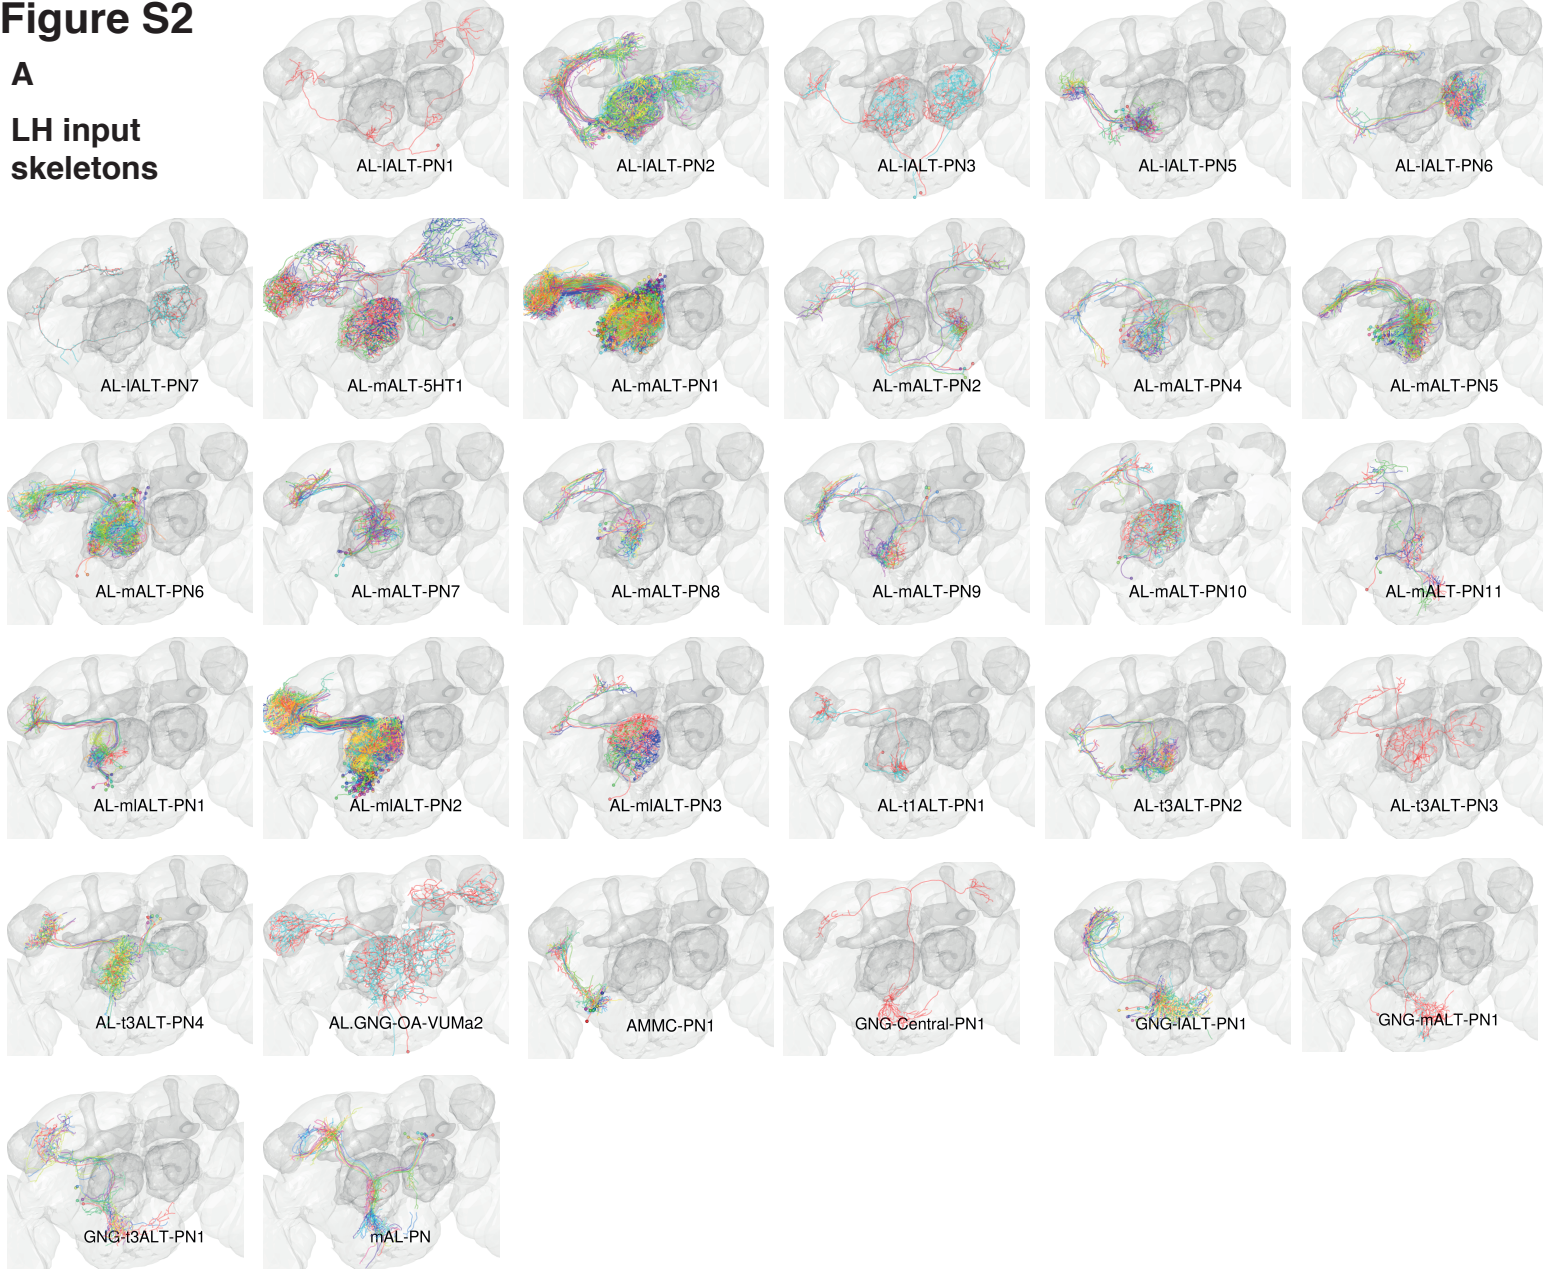

LH neuron skeletons

B

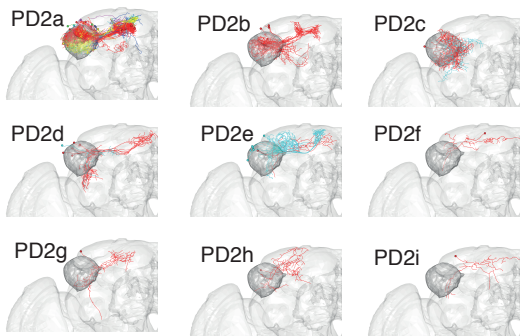

B'

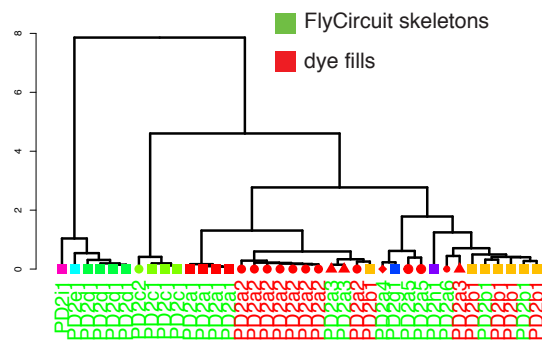

C

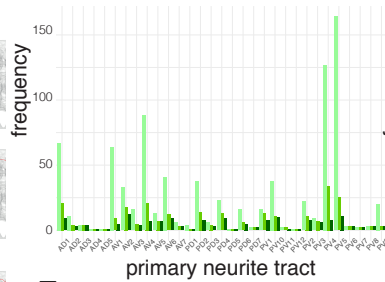

D

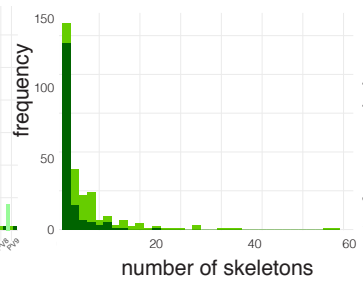

E

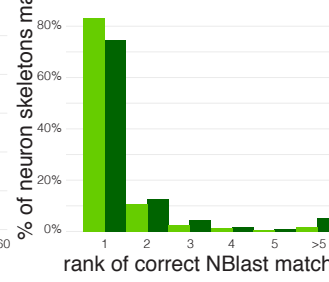

F

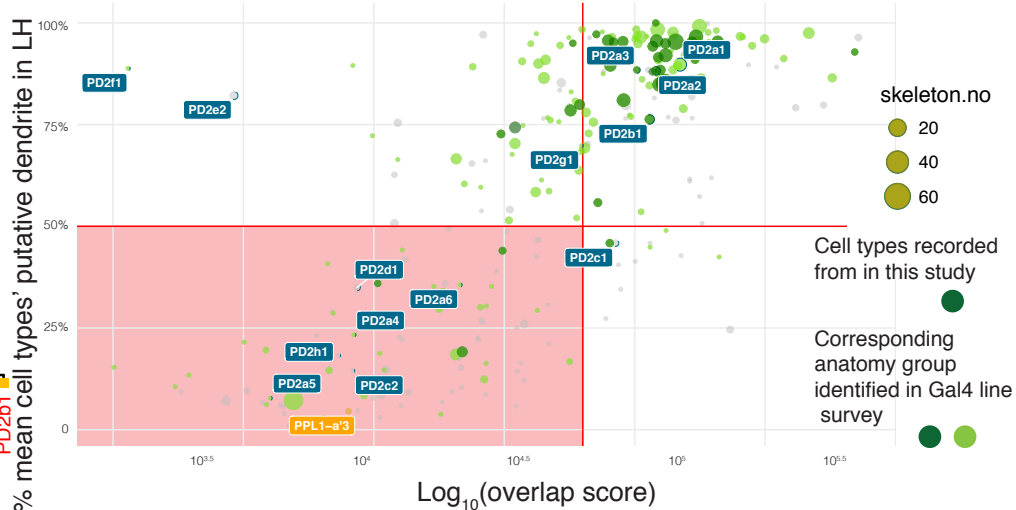

Supplement: supp [file elife_poa_e44590_Figure_2_figure_supplement_1.pdf › elife_poa_e44590_Figure_2_figure_supplement_1.pdf]
